# Supplementary material for: Alternative Aqueous Phase Synthesis of a PtRu/C Electrocatalyst for Direct Methanol Fuel Cells
Source: MDPI journal article supplement (doi:10.3390/catal11080925), 2021-07-30
Supplement: s1 [file s1]

## Supplementary Materials

### Alternative aqueous phase synthesis of a PtRu/C electrocatalyst for direct methanol fuel cells

Qijun Wang <sup>1</sup>, Ya-Wei Zhou <sup>1</sup>, Zhao Jin <sup>2,\*</sup>, Chunguang Chen<sup>1,3</sup>, Hong Li <sup>1,\*</sup> and Wen-Bin Cai <sup>1,\*</sup>

<sup>1</sup> Shanghai Key Laboratory of Molecular Catalysis and Innovative Materials, Collaborative Innovation Center of Chemistry for Energy Materials, Department of Chemistry, Fudan University, Shanghai 200438, China

<sup>2</sup> State Key Laboratory of Electroanalytical Chemistry, Changchun Institute of Applied Chemistry, Chinese Academy of Sciences, Changchun 130022, Jilin, China

<sup>3</sup> Department of Chemistry, University of Shanghai for Science and Technology, Shanghai 200093, China

\* Correspondence: zjin@ciac.ac.cn; hongli17@fudan.edu.cn; wbcai@fudan.edu.cn

#### Table of Contents

1. The average particle sizes obtained from XRD and TEM: Table S1
2. Summary of the data obtained from Pt<sup>0</sup> 4f<sub>7/2</sub> and Ru<sup>0</sup> 3p<sub>3/2</sub> core level XPS spectra: Tables S2, S3
3. Electrocatalytic performance towards CO stripping and MOR: Tables S4, S5
4. Comparison of synthetic process, particle size and MOR parameters of the PtRu/C catalysts: Table S6
5. IR band assignments: Table S7
6. Supplementary References

**Table S1.** The average particle sizes of JM Pt/C, JM PtRu/C, PtRu/C(DMAB) and PtRu/C(NaBH<sub>4</sub>) catalysts obtained from XRD and TEM (simply named as  $\bar{d}_{\text{XRD}}$  and  $\bar{d}_{\text{TEM}}$ ), respectively.

| Catalyst                   | $\bar{d}_{\text{XRD}}$ | $\bar{d}_{\text{TEM}}$ |
|----------------------------|------------------------|------------------------|
| JM Pt/C                    | 2.8                    | 2.7                    |
| JM PtRu/C                  | 2.9                    | 2.6                    |
| PtRu/C(DMAB)               | 2.1                    | 2.0                    |
| PtRu/C(NaBH <sub>4</sub> ) | 2.5                    | 2.7                    |

**Table S2.** The binding energies and relative intensities of Pt<sup>0</sup> 4f<sub>7/2</sub> core level XPS spectra for JM Pt/C, JM PtRu/C, PtRu/C(DMAB) and PtRu/C(NaBH<sub>4</sub>) catalysts.

| Catalyst                   | Species                           | Binding energy (eV) | Relative intensity (%) |
|----------------------------|-----------------------------------|---------------------|------------------------|
| JM Pt/C                    | Pt <sup>0</sup> 4f <sub>7/2</sub> | 71.1                | 57                     |
| JM PtRu/C                  |                                   | 71.4                | 57                     |
| PtRu/C(DMAB)               |                                   | 72.3                | 61                     |
| PtRu/C(NaBH <sub>4</sub> ) |                                   | 72.0                | 62                     |

**Table S3.** The binding energies and relative intensities of Ru<sup>0</sup> 3p<sub>3/2</sub> core level XPS spectra for JM PtRu/C, PtRu/C(DMAB) and PtRu/C(NaBH<sub>4</sub>) catalysts.

| Catalyst                   | Species                           | Binding energy (eV) | Relative intensity (%) |
|----------------------------|-----------------------------------|---------------------|------------------------|
| JM PtRu/C                  | Ru <sup>0</sup> 3p <sub>3/2</sub> | 462.6               | 65                     |
| PtRu/C(DMAB)               |                                   | 462.6               | 75                     |
| PtRu/C(NaBH <sub>4</sub> ) |                                   | 462.8               | 73                     |

**Table S4.** The onset ( $E_{\text{onset}}$ ) and peak potentials ( $E_{\text{peak}}$ ) of CO stripping on JM Pt/C, JM PtRu/C, PtRu/C(DMAB) and PtRu/C( $\text{NaBH}_4$ ) catalysts in 0.5 M  $\text{H}_2\text{SO}_4$ .

| Catalysts                 | $E_{\text{onset}}$ (V) | $E_{\text{peak}}$ (V) |
|---------------------------|------------------------|-----------------------|
| JM Pt/C                   | 0.435                  | 0.527                 |
| JM PtRu/C                 | 0.150                  | 0.265                 |
| PtRu/C(DMAB)              | 0.141                  | 0.252                 |
| PtRu/C( $\text{NaBH}_4$ ) | 0.145                  | 0.269                 |

**Table S5.** The electro-oxidation performance on JM Pt/C, JM PtRu/C, PtRu/C(DMAB) and PtRu/C( $\text{NaBH}_4$ ) catalysts in 0.5 M  $\text{H}_2\text{SO}_4$  + 1 M  $\text{CH}_3\text{OH}$  at a scan rate of 50 mV/s (columns 2-4) or a constant potential of 0.25 V (column 5).

| Catalyst                  | $E_{\text{onset}}$ (V) | MA ( $\text{A mg}^{-1} \text{ Pt}$ ) | $i_f / i_b$ | $i_{3600}$ ( $\text{mA mg}^{-1} \text{ Pt}$ ) |
|---------------------------|------------------------|--------------------------------------|-------------|-----------------------------------------------|
| JM Pt/C                   | 0.210                  | 0.36                                 | 1.07        | 0.8                                           |
| JM PtRu/C                 | 0.140                  | 0.30                                 | 1.80        | 23.3                                          |
| PtRu/C(DMAB)              | 0.120                  | 0.53                                 | 1.72        | 35.4                                          |
| PtRu/C( $\text{NaBH}_4$ ) | 0.144                  | 0.50                                 | 1.55        | 31.9                                          |

**Table S6.** Comparison of synthetic process, particle size and MOR parameters of the PtRu/C catalysts from this work and recent publications.

| Catalyst                                       | Synthetic process             | Particle size (nm) | $E_{\text{peak of CO oxidation}}$<br>(V vs. SCE) | $C_{\text{Methanol}}$<br>(M) | Scan rate<br>(mV/s) | MA<br>(A/mg <sub>Pt</sub> ) | Ref.      |
|------------------------------------------------|-------------------------------|--------------------|--------------------------------------------------|------------------------------|---------------------|-----------------------------|-----------|
| PtRu-CoP/C-40%                                 | Polyol reduction              | 2.6                | 0.38                                             | 1.0                          | 50                  | 1.01                        | [1]       |
| PtRu30/TECNF                                   | Polyol reduction              | 3.5                | 0.33                                             | 0.5                          | 20                  | 0.45                        | [2]       |
| PtRu/CB@NxC-20%                                | Organic phase synthesis       | 3.8                | 0.41                                             | 1.0                          | 50                  | 0.51                        | [3]       |
| PtRu Nws/C                                     | Organic phase synthesis       | 1.8                | Not mentioned                                    | 0.5                          | 50                  | 0.82                        | [4]       |
| PtRu/PC-H                                      | Impregnation-H <sub>2</sub>   | 2.8                | 0.39                                             | 0.5                          | 50                  | 1.67                        | [5]       |
| HCNT/E-HBM/<br>PtRu@PBI                        | Polymer coating               | 2.2                | 0.38                                             | 1.0                          | 50                  | 0.40                        | [6]       |
| Pt <sub>1</sub> Ru <sub>1</sub><br>nano-sponge | Aqueous phase synthesis       | Not particle       | 0.29                                             | 1.0                          | 50                  | 0.30                        | [7]       |
| PtRu/BDDNP                                     | Aqueous phase synthesis       | 4.0                | 0.31                                             | 1.0                          | 50                  | 0.29                        | [8]       |
| PtRu/PPDA-MWCNTs                               | Aqueous phase synthesis       | 3.5                | 0.35, 0.58                                       | 1.0                          | 50                  | 0.73                        | [9]       |
| PtRu/C(DMAB)                                   | Aqueous phase synthesis       | 2.0                | 0.252                                            | 1.0                          | 50                  | 0.53                        | This work |
| JM PtRu/C                                      | Maybe organic phase synthesis | 2.7                | 0.265                                            | 1.0                          | 50                  | 0.30                        | This work |

**Table S7.** IR band assignments in this work.

| Wavenumber (cm <sup>-1</sup> ) | Assignments                                                  |
|--------------------------------|--------------------------------------------------------------|
| ~ 2340                         | asymmetric stretching of interfacial CO <sub>2</sub> [10-12] |
| 2019~2053                      | linearly bonded CO on Pt (Pt-CO <sub>L</sub> ) [13-15]       |
| 1935~1972                      | linearly bonded CO on Ru (Ru-CO <sub>L</sub> ) [16-18]       |
| ~ 1723                         | C=O stretching of dissolved formic acid (HCOOH) [10,13,19]   |
| ~ 1610                         | bending modes $\delta$ (HOH) of interfacial water [17,20,21] |
| ~ 1323                         | bridge-bonded formate (HCOO <sub>B</sub> ) [14,22,23]        |

### Supplementary References

1. Feng, L.; Li, K.; Chang, J.; Liu, C.; Xing, W. Nanostructured PtRu/C Catalyst Promoted by CoP as an Efficient and Robust Anode Catalyst in Direct Methanol Fuel Cells. *Nano Energy* **2015**, *15*, 462-469.
2. Tsukagoshi, Y.; Ishitobi, H.; Nakagawa, N. Improved Performance of Direct Methanol Fuel Cells with the Porous Catalyst Layer Using Highly-active Nanofiber Catalyst. *Carbon Resources Conversion* **2018**, *1*, 61-72.
3. Zhang, Q.; Yang, Z.; Ling, Y.; Yu, X.; Zhang, Y.; Cheng, H. Improvement in Stability of PtRu Electrocatalyst by Carbonization of in-situ Polymerized Polyaniline. *Int. J. Hydrogen Energy* **2018**, *43*, 12730-12738.
4. Huang, L.; Zhang, X.; Wang, Q.; Han, Y.; Fang, Y.; Dong, S. Shape-Control of Pt-Ru Nanocrystals: Tuning Surface Structure for Enhanced Electrocatalytic Methanol Oxidation. *J. Am. Chem. Soc.* **2018**, *140*, 1142-1147.
5. Zhang, J.; Qu, X.; Han, Y.; Shen, L.; Yin, S.; Li, G.; Jiang, Y.; Sun, S. Engineering PtRu Bimetallic Nanoparticles with Adjustable Alloying Degree for Methanol Electrooxidation: Enhanced Catalytic Performance. *Appl. Catal. B: Environ.* **2020**, *263*, 118345.
6. Luo, F.; Zhang, Q.; Qu, K.; Guo, L.; Hu, H.; Yang, Z.; Cai, W.; Cheng, H. Decorated PtRu Electrocatalyst for Concentrated Direct Methanol Fuel Cells. *Chemcatchem* **2019**, *11*, 1238-1243.
7. Xiao, M.; Feng, L.; Zhu, J.; Liu, C.; Xing, W. Rapid Synthesis of a PtRu Nano-sponge with Different Surface Compositions and Performance Evaluation for Methanol Electrooxidation. *Nanoscale* **2015**, *7*, 9467-9471.

8. La-Torre-Riveros, L.; Guzman-Blas, R.; Méndez-Torres, A. E.; Prelas, M.; Tryk, D. A.; Cabrera, C. R. Diamond Nanoparticles as a Support for Pt and PtRu Catalysts for Direct Methanol Fuel Cells. *ACS Appl. Mater. Interfaces* **2012**, *4*, 1134-1147.
9. Wu, B.; Zhu, J.; Li, X.; Wang, X.; Chu, J.; Xiong, S. PtRu Nanoparticles Supported on p-phenylenediamine-functionalized Multiwalled Carbon Nanotubes: Enhanced Activity and Stability for Methanol Oxidation. *Ionics* **2018**, *25*, 181-189.
10. Wang, J.-Y.; Zhang, H.-X.; Jiang, K.; Cai, W.-B. From HCOOH to CO at Pd Electrodes: A Surface-enhanced Infrared Spectroscopy Study. *J. Am. Chem. Soc.* **2011**, *133*, 14876-14879.
11. Jiang, K.; Xu, K.; Zou, S.; Cai, W.-B. B-doped Pd Catalyst: Boosting Room-temperature Hydrogen Production from Formic Acid-Formate Solutions. *J. Am. Chem. Soc.* **2014**, *136*, 4861-4864.
12. Chang, J.; Feng, L.; Jiang, K.; Xue, H.; Cai, W.-B.; Liu, C.; Xing, W. Pt-CoP/C as an Alternative PtRu/C Catalyst for Direct Methanol Fuel Cells. *J. Mater. Chem. A* **2016**, *4*, 18607-18613.
13. Zhou, Y.-W.; Chen, Y.-F.; Jiang, K.; Liu, Z.; Mao, Z.-J.; Zhang, W.-Y.; Lin, W.-F.; Cai, W.-B. Probing the Enhanced Methanol Electrooxidation Mechanism on Platinum-Metal Oxide Catalyst. *Appl. Catal. B: Environ.* **2021**, *280*, 119393.
14. Chen, Y. X.; Miki, A.; Ye, S.; Sakai, H.; Osawa, M. Formate, an Active Intermediate for Direct Oxidation of Methanol on Pt Electrode. *J. Am. Chem. Soc.* **2003**, *125*, 3680-3681.
15. Sato, T.; Kunimatsu, K.; Uchida, H.; Watanabe, M. Adsorption/Oxidation of CO on Highly Dispersed Pt Catalyst Studied by Combined Electrochemical and ATR-FTIRAS Methods. *Electrochim. Acta* **2007**, *53*, 1265-1278.
16. Sato, T.; Okaya, K.; Kunimatsu, K.; Yano, H.; Watanabe, M.; Uchida, H. Effect of Particle Size and Composition on CO-tolerance at Pt-Ru/C Catalysts Analyzed by in situ Attenuated Total Reflection FTIR Spectroscopy. *ACS Catal.* **2012**, *2*, 450-455.
17. Yajima, T.; Uchida, H.; Watanabe, M. In-situ ATR-FTIR Spectroscopic Study of Electro-oxidation of Methanol and Adsorbed CO at Pt-Ru Alloy. *J. Phys. Chem. B* **2004**, *108*, 2654-2659.
18. Park, S.; Wieckowski, A.; Weaver, M. J. Electrochemical Infrared Characterization of CO Domains on Ruthenium-decorated Platinum Nanoparticles. *J. Am. Chem. Soc.* **2003**, *125*, 2282-2290.
19. Iwasita, T.; Nart, F. C.; Vielstich, W. An FTIR Study of the Catalytic Activity of a 85-15 Pt-Ru Alloy for Methanol Oxidation. *Ber. Bunsen-Ges. Phys. Chem* **1990**, *94*, 1030-1034.
20. Watanabe, M.; Sato, T.; Kunimatsu, K.; Uchida, H. Temperature Dependence of CO-adsorption of Carbon Monoxide and Water on Highly Dispersed Pt/C and PtRu/C Electrodes Studied by in-situ

ATR-FTIRAS. *Electrochim. Acta* **2008**, *53*, 6928-6937.

21. Kunitatsu, K.; Sato, T.; Uchida, H.; Watanabe, M. Adsorption/Oxidation of CO on Highly Dispersed Pt Catalyst Studied by Combined Electrochemical and ATR-FTIRAS Methods: Oxidation of CO Adsorbed on Carbon-supported Pt Catalyst and Unsupported Pt Black. *Langmuir* **2008**, *24*, 3590-3601.
22. Miki, A.; Ye, S.; Senzaki, T.; Osawa, M. Surface-enhanced Infrared Study of Catalytic Electrooxidation of Formaldehyde, Methyl Formate, and Dimethoxymethane on Platinum Electrodes in Acidic Solution. *J. Electroanal. Chem.* **2004**, *563*, 23-31.
23. Miki, A.; Ye, S.; Osawa, M. Surface-enhanced IR Absorption on Platinum Nanoparticles: An Application to Real-time Monitoring of Electrocatalytic Reactions. *Chem. Commun.* **2002**, 1500-1501.
